# Supplementary material for: Long-Term Changes in Poststroke Depressive Symptoms: Effects of Functional Disability and Social Support
Source: Atypon-hosted journal article supplement (doi:10.1176/appi.neuropsych.20220134), 2023-03-31
Supplement: appi.neuropsych.20220134.ds001.pdf [file appi.neuropsych.20220134.ds001.pdf]

Table S1. Baseline characteristics and clinical variables of the study population.

| Variable                                           | Participants (N=222) |         |
|----------------------------------------------------|----------------------|---------|
|                                                    | N                    | %       |
| Age, years (mean±SD)                               | 61.9                 | 11.7    |
| Female sex                                         | 86                   | 38.7    |
| Use of escitalopram                                | 112                  | 50.5    |
| Hypertension                                       | 167                  | 75.2    |
| Diabetes                                           | 93                   | 41.9    |
| Hyperlipidemia                                     | 112                  | 50.5    |
| Coronary artery disease                            | 35                   | 15.8    |
| Smoking                                            | 116                  | 52.3    |
| Lesion location                                    |                      |         |
| Anterior circulation                               | 139                  | 62.6    |
| Posterior circulation                              | 77                   | 34.7    |
| Both                                               | 6                    | 2.7     |
| Lesion side                                        |                      |         |
| Right                                              | 99                   | 44.6    |
| Left                                               | 107                  | 48.2    |
| Both                                               | 16                   | 7.2     |
| Baseline MADRS score (mean±SD)                     | 9.3                  | 8.0     |
| Baseline PSD                                       | 113                  | 50.9    |
| Baseline NIHSS score (median, interquartile range) | 4.0                  | 3.0–7.0 |
| Baseline mRS score (median, interquartile range)   | 4.0                  | 3.0–5.0 |

MADRS, Montgomery-Åsberg depression rating scale; PSD, post-stroke depression; NIHSS, National Institutes of Health Stroke Scale; mRS, modified Rankin Scale.
